# Supplementary material for: Competition between H4PteGlu and H2PtePAS Confers para-Aminosalicylic Acid Resistance in Mycobacterium tuberculosis
Source: MDPI journal article supplement (doi:10.3390/antibiotics13010013), 2023-12-21
Supplement: s1 [file s1]

**Supplementary Table S1.** Collection parameters of multiple reaction monitoring (MRM).

| Bio-transformed Products  | RT (min) | Ionization channel | Electrospray ionization |
|---------------------------|----------|--------------------|-------------------------|
| H <sub>2</sub> PtePAS     | 3.193    | 331.0 -> 178.0     | ESI+                    |
| H <sub>2</sub> PtePAS-Glu | 3.181    | 460.0 -> 178.0     | ESI+                    |

**Supplementary Table S2.** Mutation analysis of *ribD* in *ThyA* or *DfrA* deficient *M. tuberculosis* isolates.

| genome_ID       | <i>thyA</i> _CDS | <i>dfrA</i> _CDS | <i>ribD</i> _promoter | <i>ribD</i> _CDS | Reference        |
|-----------------|------------------|------------------|-----------------------|------------------|------------------|
| ERR502929       | deletion         | deletion         | WT                    | WT               | [22]             |
| ERR751453       | deletion         | deletion         | WT                    | WT               |                  |
| ERR775373       | deletion         | deletion         | WT                    | WT               |                  |
| ERR779910       | deletion         | deletion         | WT                    | WT               |                  |
| SRR16588749     | deletion         | deletion         | WT                    | WT               | [11]             |
| SRR1952721      | deletion         | deletion         | WT                    | WT               |                  |
| SRR2328057      | deletion         | deletion         | WT                    | WT               | [27]             |
| SRR2333215      | deletion         | deletion         | WT                    | WT               |                  |
| GCA_000177835.2 | Leu63fs          | WT               | WT                    | WT               | NCBI<br>database |
| GCA_000652475.1 | Thr22fs          | WT               | WT                    | WT               |                  |
| GCA_000657935.1 | Gln165*          | WT               | WT                    | WT               |                  |
| GCA_000657955.1 | Gln165*          | WT               | WT                    | WT               |                  |
| GCA_000657995.1 | Gln165*          | WT               | WT                    | WT               |                  |
| GCA_000658015.1 | Gln165*          | WT               | WT                    | WT               |                  |
| GCA_000669315.1 | Gln165*          | WT               | WT                    | WT               |                  |
| GCA_000669395.1 | Gln165*          | WT               | WT                    | WT               |                  |
| GCA_000669555.1 | Gln165*          | WT               | WT                    | WT               |                  |
| GCA_000673575.1 | Gln165*          | WT               | WT                    | WT               |                  |
| GCA_000673735.1 | Gln165*          | WT               | WT                    | WT               |                  |
| GCA_000673755.1 | Glu139*          | WT               | WT                    | WT               |                  |
| GCA_000674395.1 | Trp80*           | WT               | WT                    | WT               |                  |
| GCA_000674475.1 | Gln165*          | WT               | WT                    | WT               |                  |
| GCA_000674535.1 | Arg99*           | WT               | WT                    | WT               |                  |
| GCA_000674575.1 | Gln165*          | WT               | WT                    | WT               |                  |
| GCA_000677115.1 | Trp133*          | WT               | WT                    | WT               |                  |
| GCA_000678495.1 | Gln111*          | WT               | WT                    | WT               |                  |
| GCA_000679475.1 | Leu63fs          | WT               | WT                    | WT               |                  |
| GCA_000804245.1 | Glu139*          | WT               | WT                    | WT               |                  |
| GCA_003392965.1 | Ile69fs          | WT               | WT                    | WT               |                  |
| GCA_014900815.1 | Tyr4fs           | WT               | WT                    | WT               |                  |
| GCA_021026275.1 | Ser180fs         | WT               | WT                    | WT               |                  |

Fs, frameshift; \*, stop transcription



**Supplementary Table S3.** Plasmids, strains, and primers used in this study.

| Category        | Name                                 | Characterization/Sequence (5'-3')                                                                                                              | Source                                                          |
|-----------------|--------------------------------------|------------------------------------------------------------------------------------------------------------------------------------------------|-----------------------------------------------------------------|
| <b>Plasmids</b> |                                      |                                                                                                                                                |                                                                 |
|                 | pMAL-c2X                             | <i>E. coli</i> expression plasmid under control of Tac promoter with N-terminal MBP tag linked with a factor Xa cleavage site, Ap <sup>R</sup> | New England BioLabs                                             |
|                 | pMAL-c2X:: <i>folC</i>               | pMAL-c2X with <i>M. tuberculosis</i> H37Rv <i>folC</i> inserted downstream of the Tac promoter, Ap <sup>R</sup>                                | This study                                                      |
|                 | pET28a                               | <i>E. coli</i> expression plasmid under control of T7 promoter with N-terminal His tag, Km <sup>R</sup>                                        | Novagen                                                         |
|                 | pET28a:: <i>folP1</i>                | pET28a with <i>M. tuberculosis</i> H37Rv <i>folP1</i> inserted downstream of the T7 promoter, Km <sup>R</sup>                                  | This study                                                      |
|                 | pMV261                               | Non-integrated shuttle plasmid under control of <i>hsp60</i> promoter, Km <sup>R</sup>                                                         | Prof. William R Jacobs Jr, Albert Einsterin College of Medicine |
|                 | pMV261:: <i>thyA</i>                 | pMV261 with <i>M. tuberculosis</i> H37Rv <i>thyA</i> inserted downstream of the <i>hsp60</i> promoter, Km <sup>R</sup>                         | This study                                                      |
|                 | pMV261:: <i>thyX</i>                 | pMV261 with <i>M. tuberculosis</i> H37Rv <i>thyX</i> inserted downstream of the <i>hsp60</i> promoter, Km <sup>R</sup>                         | This study                                                      |
|                 | pMV261:: <i>folP1</i>                | pMV261 with <i>M. tuberculosis</i> H37Rv <i>folP1</i> inserted downstream of the <i>hsp60</i> promoter, Km <sup>R</sup>                        | This study                                                      |
|                 | pMV261:: <i>folC</i>                 | pMV261 with <i>M. tuberculosis</i> H37Rv <i>folC</i> inserted downstream of the <i>hsp60</i> promoter, Km <sup>R</sup>                         | This study                                                      |
|                 | pMV261:: <i>dfrA</i>                 | pMV261 with <i>M. tuberculosis</i> H37Rv <i>dfrA</i> inserted downstream of the <i>hsp60</i> promoter, Km <sup>R</sup>                         | This study                                                      |
|                 | p0004s                               | Homologous arms construction plasmid, HygB <sup>R</sup>                                                                                        | Prof. William R Jacobs Jr, Albert Einsterin College of Medicine |
|                 | phAE159                              | Phage transduction plasmid, Ap <sup>R</sup>                                                                                                    | Prof. William R Jacobs Jr, Albert Einsterin College of Medicine |
| <b>Strains</b>  |                                      |                                                                                                                                                |                                                                 |
|                 | <i>E. coli</i> BL21 (DE3)            | Host for protein expression                                                                                                                    | New England BioLabs                                             |
|                 | BL21 (DE3)<br>pMAL-c2X:: <i>folC</i> | <i>E. coli</i> BL21 (DE3) transformed with pMAL-c2X:: <i>folC</i>                                                                              | This study                                                      |



|                                                             |                                                                                                        |                                                                                   |
|-------------------------------------------------------------|--------------------------------------------------------------------------------------------------------|-----------------------------------------------------------------------------------|
| BL21 (DE3)<br>pET28a:: <i>folP1</i><br><i>E. coli</i> HB101 | <i>E. coli</i> BL21 (DE3) transformed with pET28a:: <i>folP1</i><br><br>Host for plasmid amplification | This study<br><br>Prof. William R Jacobs Jr, Albert Einsterin College of Medicine |
| <i>M. smegmatis</i> mc <sup>2</sup> 155                     | High-efficiency transformation strain                                                                  | Prof. William R Jacobs Jr, Albert Einsterin College of Medicine                   |
| H37Ra                                                       | <i>M. tuberculosis</i> H37Ra avirulent strains                                                         | Prof. William R Jacobs Jr, Albert Einsterin College of Medicine                   |
| H37Ra $\Delta$ <i>thyA</i>                                  | <i>M. tuberculosis</i> H37Ra with <i>thyA</i> gene deletion                                            | This study                                                                        |
| H37Ra pMV261                                                | <i>M. tuberculosis</i> H37Ra transformed with pMV261                                                   | This study                                                                        |
| H37Ra $\Delta$ <i>thyA</i> pMV261                           | <i>M. tuberculosis</i> H37Ra $\Delta$ <i>thyA</i> transformed with pMV261                              | This study                                                                        |
| H37Ra $\Delta$ <i>thyA</i> pMV261:: <i>thyA</i>             | <i>M. tuberculosis</i> H37Ra $\Delta$ <i>thyA</i> transformed with pMV261:: <i>thyA</i>                | This study                                                                        |
| H37Ra $\Delta$ <i>thyA</i> pMV261:: <i>thyX</i>             | <i>M. tuberculosis</i> H37Ra $\Delta$ <i>thyA</i> transformed with pMV261:: <i>thyX</i>                | This study                                                                        |
| H37Ra $\Delta$ <i>thyA</i> pMV261:: <i>folP1</i>            | <i>M. tuberculosis</i> H37Ra $\Delta$ <i>thyA</i> transformed with pMV261:: <i>folP1</i>               | This study                                                                        |
| H37Ra $\Delta$ <i>thyA</i> pMV261:: <i>folC</i>             | <i>M. tuberculosis</i> H37Ra $\Delta$ <i>thyA</i> transformed with pMV261:: <i>folC</i>                | This study                                                                        |
| H37Ra $\Delta$ <i>thyA</i> pMV261:: <i>dfrA</i>             | <i>M. tuberculosis</i> H37Ra $\Delta$ <i>thyA</i> transformed with pMV261:: <i>dfrA</i>                | This study                                                                        |
| H37Ra pMV261:: <i>thyA</i>                                  | <i>M. tuberculosis</i> H37Ra transformed with pMV261:: <i>thyA</i>                                     | This study                                                                        |
| H37Ra pMV261:: <i>thyX</i>                                  | <i>M. tuberculosis</i> H37Ra transformed with pMV261:: <i>thyX</i>                                     | This study                                                                        |
| H37Ra pMV261:: <i>folP1</i>                                 | <i>M. tuberculosis</i> H37Ra transformed with pMV261:: <i>folP1</i>                                    | This study                                                                        |
| H37Ra pMV261:: <i>folC</i>                                  | <i>M. tuberculosis</i> H37Ra transformed with pMV261:: <i>folC</i>                                     | This study                                                                        |
| H37Ra pMV261:: <i>dfrA</i>                                  | <i>M. tuberculosis</i> H37Ra transformed with pMV261:: <i>dfrA</i>                                     | This study                                                                        |
| F461                                                        | Clinical isolate of <i>M. tuberculosis</i> H37Rv with mutation <i>thyA</i> ( <sup>235</sup> Arg→Pro)   | Chongqing Public Health Medical Center                                            |
| F461 pMV261:: <i>folC</i>                                   | <i>thyA</i> ( <sup>235</sup> Arg→Pro) transformed with pMV261:: <i>folC</i>                            | This study                                                                        |



|                 |                                             |            |
|-----------------|---------------------------------------------|------------|
| folC-BamHI-F    | TTAAGGATCCATGAATTCGACGAATTCCGG              | This study |
| folC-HindIII-R  | TTACAAGCTTTTATTGCGGATCACGACC                | This study |
| folP1-EcoRI-F   | ATAGAATTCATGAGTCCGGCGCCCGTGCA               | This study |
| folP1-HindIII-R | ATAAAGCTTTTAGCCATCGCGTTCTATCCTTTCC          | This study |
| dfrA-BamHI-F    | TTAAGGATCCATGGTGGGGCTGATCTGGGCT             | This study |
| dfrA-HindIII-R  | TAATAAGCTTTTATGAGCGGTGGTAGCTGTAC            | This study |
| thyA-BamHI-F    | TTAAGGATCCATGACGCCATACGAGGACCTGCTGC         | This study |
| thyA-HindIII-R  | TACTAAGCTTTTATACCGCGACTGGAGCTTTGATCG        | This study |
| thyX-BamHI-F    | TTAAGGATCCATGGCCGAGACCGCGCCGCTG             | This study |
| thyX-HindIII-R  | TACTAAGCTTTTAGGCTTCGGTCGCCAACGGGCT          | This study |
| pMV261-JDFP     | GTGGCAGCGAGGACAACCTTG                       | This study |
| pMV261-JDRP     | GATGCCTGGCAGTCGATCGTAC                      | This study |
| thyAko-LFP      | TTTTTTTTCCATAAATTGGCCGGGTAGCACTCGATGCGGTGCG | This study |
| thyAko-LRP      | TTTTTTTTCCATTCTTGGTCGAGCACGAAGCGCAGCAGGTCCT | This study |
| thyAko-RFP      | TTTTTTTTCCATAGATTGGATCCGCATCCGGCGATCAAAGCT  | This study |
| thyAko-RRP      | TTTTTTTTCCATCTTTTGGGTAATACAAGTGCCGGCGTTTGCC | This study |
| thyA-IDF        | ATCGGGATCGACGTCGCGGCGCCT                    | This study |
| thyA-IDR        | AGATCACCCCGGGTGGACACGGCGAT                  | This study |



## Supplementary Figures and Figure Legends

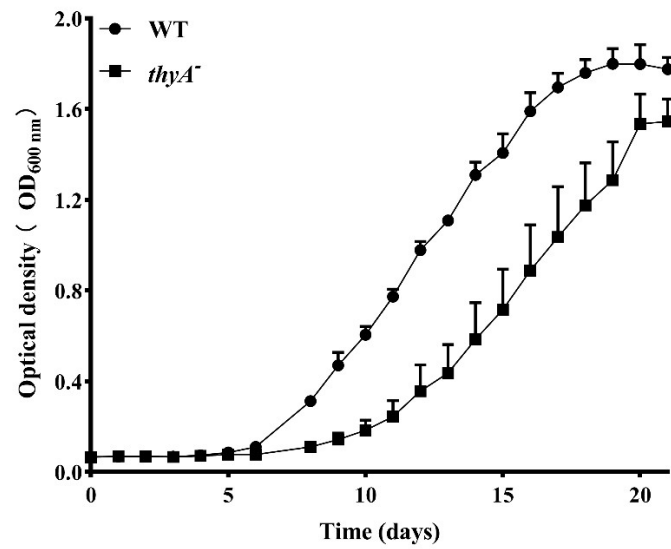

**Figure S1.** Growth curves of H37Ra (WT) and H37Ra  $\Delta$ *thyA* (*thyA*<sup>-</sup>) in liquid culture at 37°C. The OD<sub>600</sub> was measured by using a SynergyH1 Hybrid reader (BioTek, USA). Data represent the means of three biological replicates, and error bars denote the standard deviations.

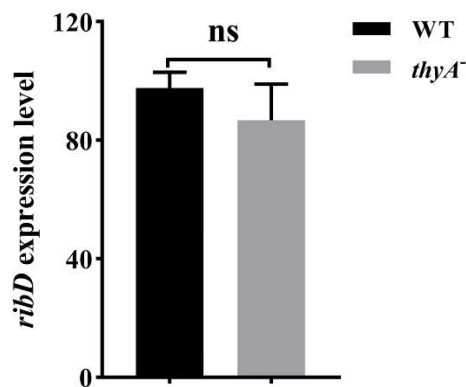

**Figure S2.** Comparison of the transcriptional level of the *ribD* gene during the exponential phase in H37Ra (WT) and H37Ra  $\Delta$ *thyA* (*thyA*<sup>-</sup>) by RNA-seq. ns, no significance.
